# Supplementary material for: Detoxification of Aflatoxin-Contaminated Maize by Neutral Electrolyzed Oxidizing Water
Source: Toxins (Basel). 2015 Oct 23;7(10):4294–314. doi: 10.3390/toxins7104294 (PMC4626735; doi:10.3390/toxins7104294)
Supplement: Supplementary file 1 [file toxins-07-04294-s001.pdf]

## Supplementary Materials

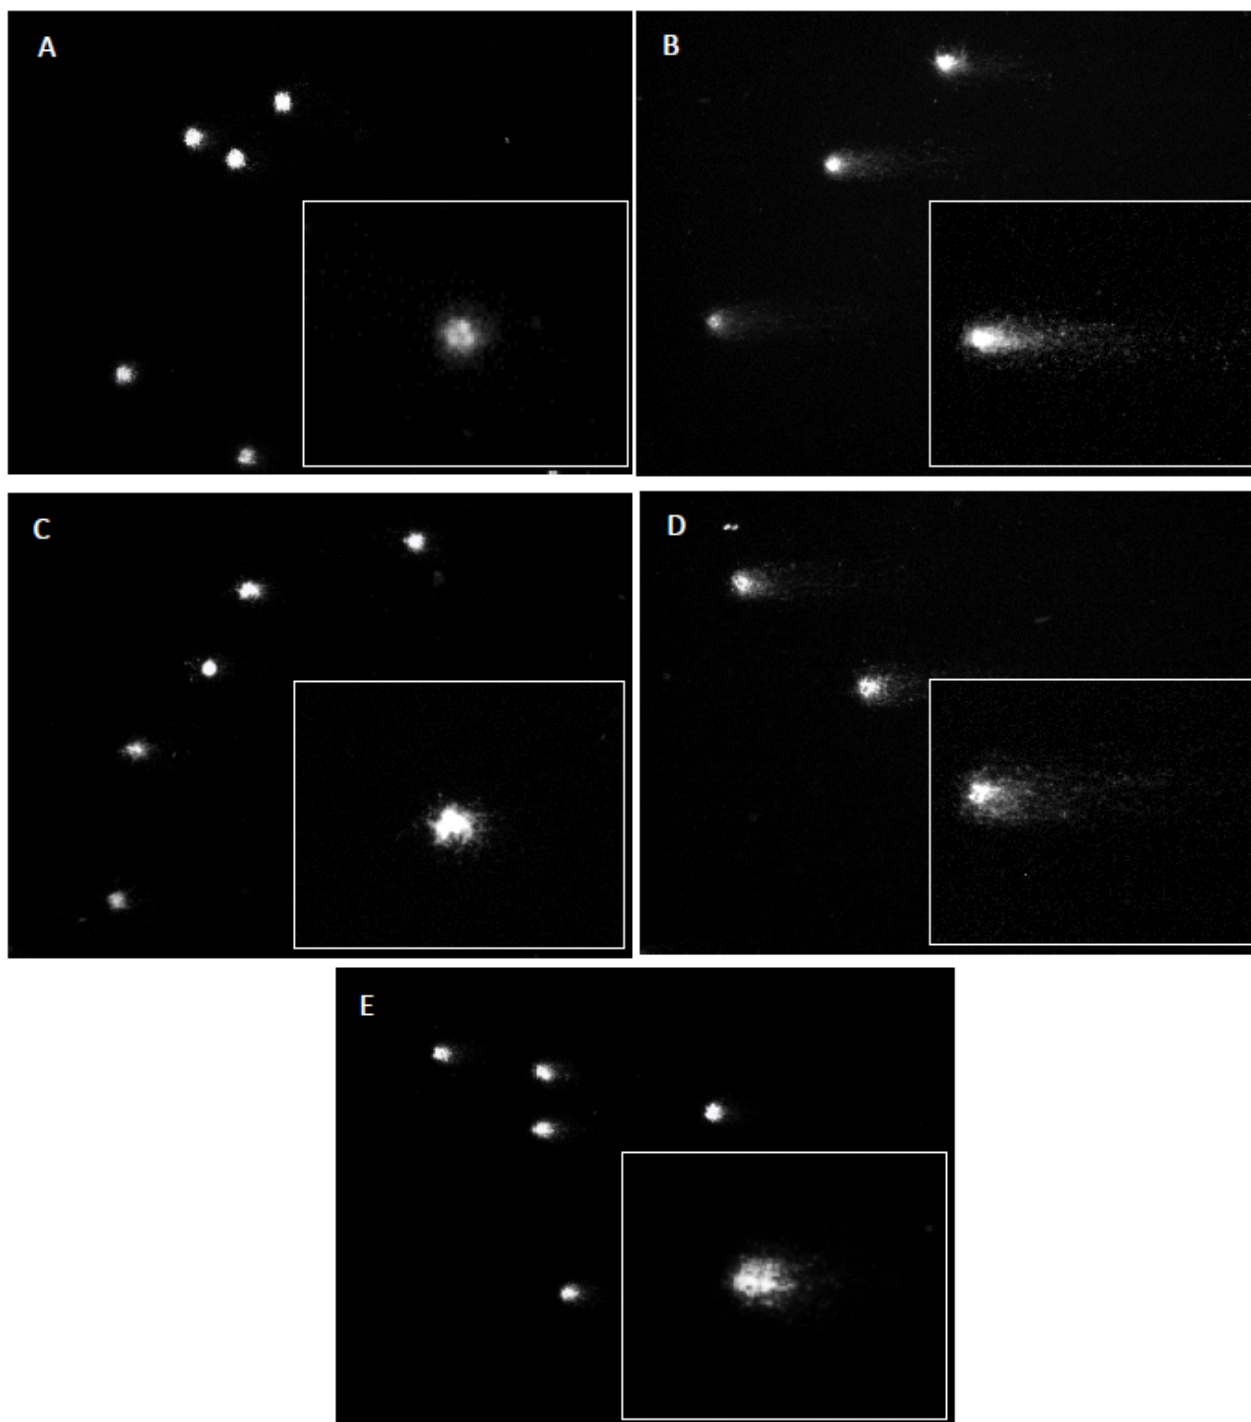

**Figure S1.** Representative comet images of human lymphocytes stained with ethidium bromide solution. (A) negative control (DMSO); (B) positive control (H<sub>2</sub>O<sub>2</sub>, 30 mM); (C) NEW (4 μL/mL); (D) untreated aflatoxins (AF at 6 ng/mL); (E), aflatoxins treated with NEW (AF + NEW at 6 ng/mL). Inset at higher magnification shows the differences in DNA migration pattern.
